# Supplementary material for: Nitrogen-rich activated carbon monoliths via ice-templating with high CO2 and H2 adsorption capacities
Source: Royal Society of Chemistry journal article supplement (doi:10.1039/c6ta09078h), 2017-01-01
Supplement: c6ta09078h1.pdf [file c6ta09078h1.pdf]

## Electronic Supplementary Information

### Nitrogen-rich activated carbon monoliths via ice-templating with high CO<sub>2</sub> and H<sub>2</sub> adsorption capacities

Aled D. Roberts,<sup>a,b</sup> Jet-Sing M. Lee,<sup>a</sup> Siew Yee Wong,<sup>b</sup> Xu Li<sup>\*b,c</sup> and Haifei Zhang<sup>\*a</sup>

<sup>a</sup> Department of Chemistry, University of Liverpool, United Kingdom, L69 7ZD.

<sup>b</sup> Institute of Materials Research and Engineering (IMRE), 2 Fusionopolis Way, Innovis, #08-03, Singapore 138634.

<sup>c</sup> Department of Chemistry, National University of Singapore, 3 Science Drive, Singapore 117543.  
E-mail: zhanghf@liv.ac.uk(HZ), x-li@imre.a-star.edu.sg (XL).

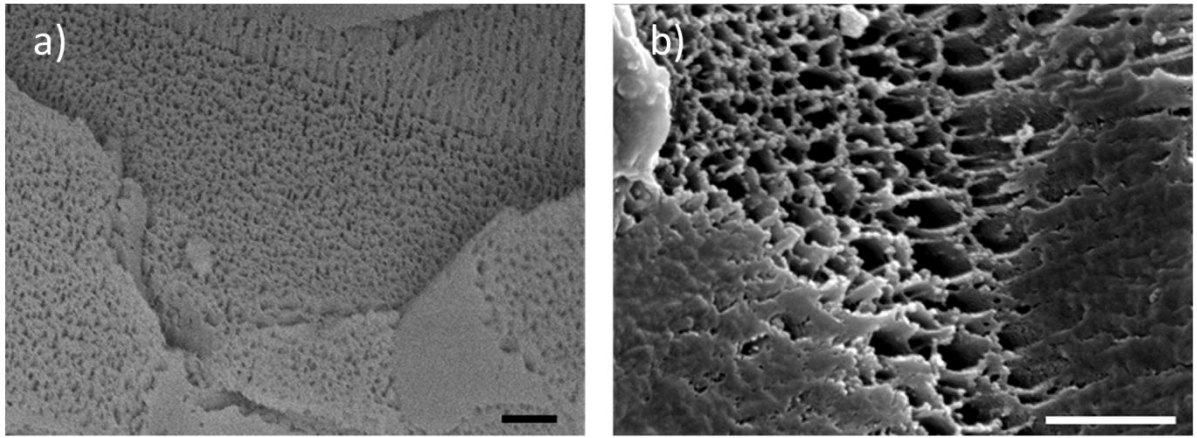

**Fig. S1** SEM images of the ice-templated PAN polymer (IT-PAN10) at a) x11000 and b) x27000 magnification. Scale bar = 1  $\mu\text{m}$

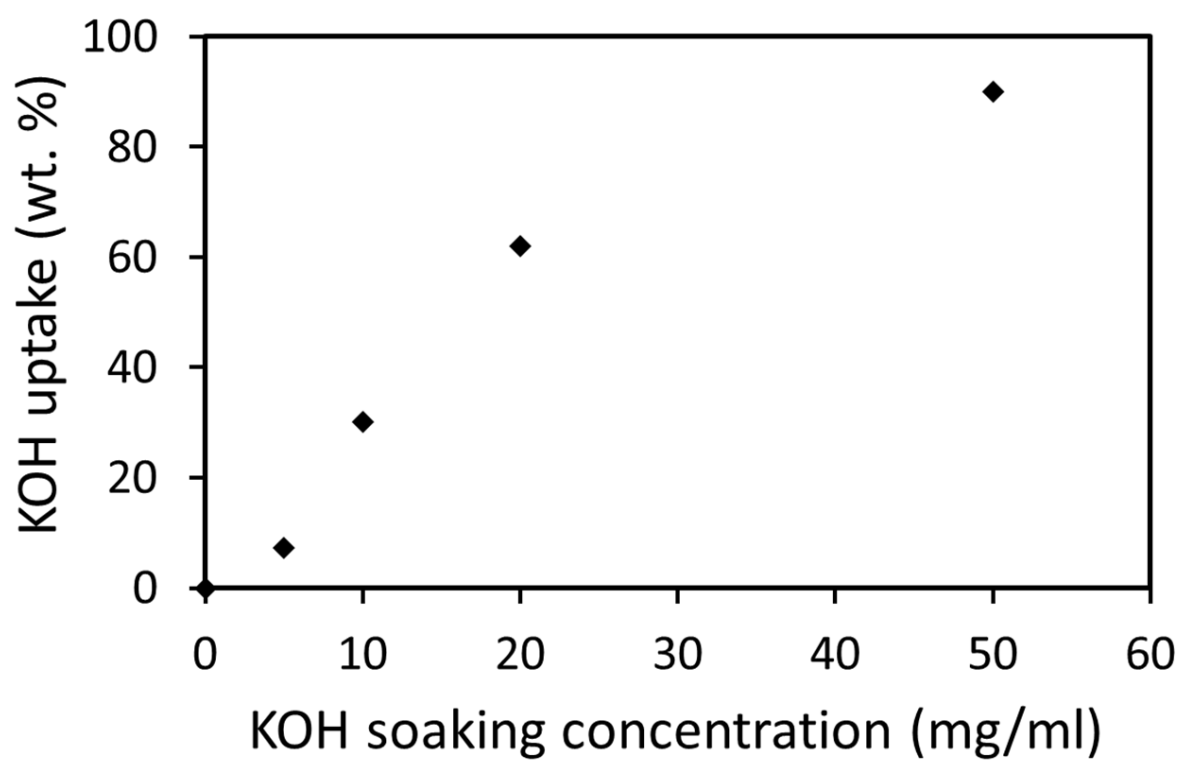

**Fig. S2** Relationship between KOH soaking concentration and KOH uptake within the ice-templated porous PAN.

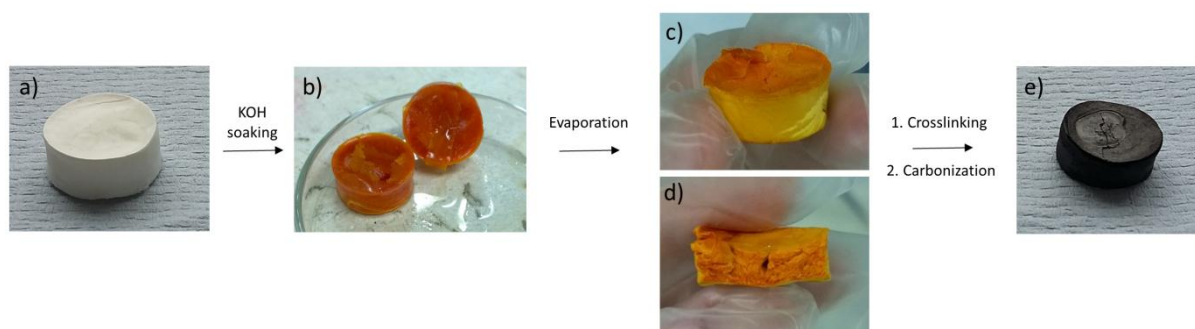

**Fig. S3** a) IT-PAN10 monolith, b) after soaking in 10 mg ml<sup>-1</sup> aqueous KOH, c) after KOH soaking and drying, d) cross-sectional view after KOH soaking and drying e) after crosslinking and carbonization (IT-AC10).

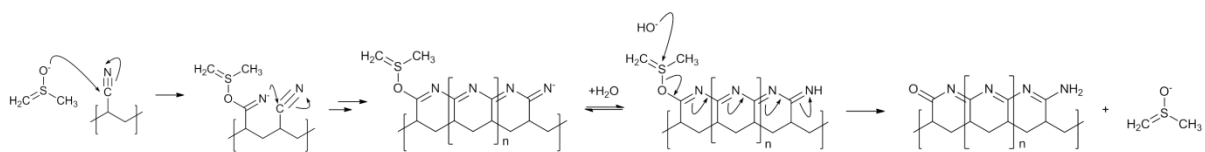

**Fig. S4** Proposed base-catalysed intra-molecular cyclization of the nitrile backbone of the PAN polymer into a conjugated ladder-type polymer

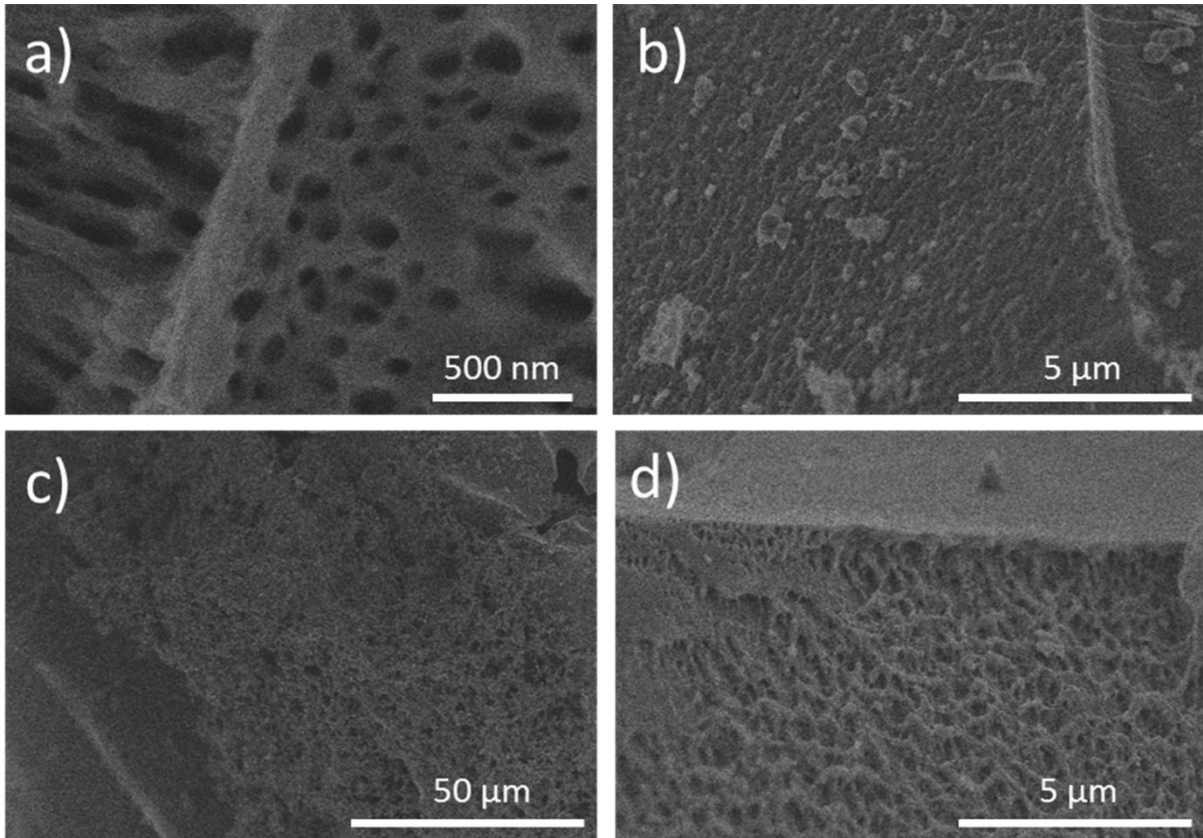

**Fig. S5** SEM images of carbonized samples of ice-templated PAN: a) IT-AC5, b) IT-AC10, c) IT-AC50 and d) IT-ACMAX

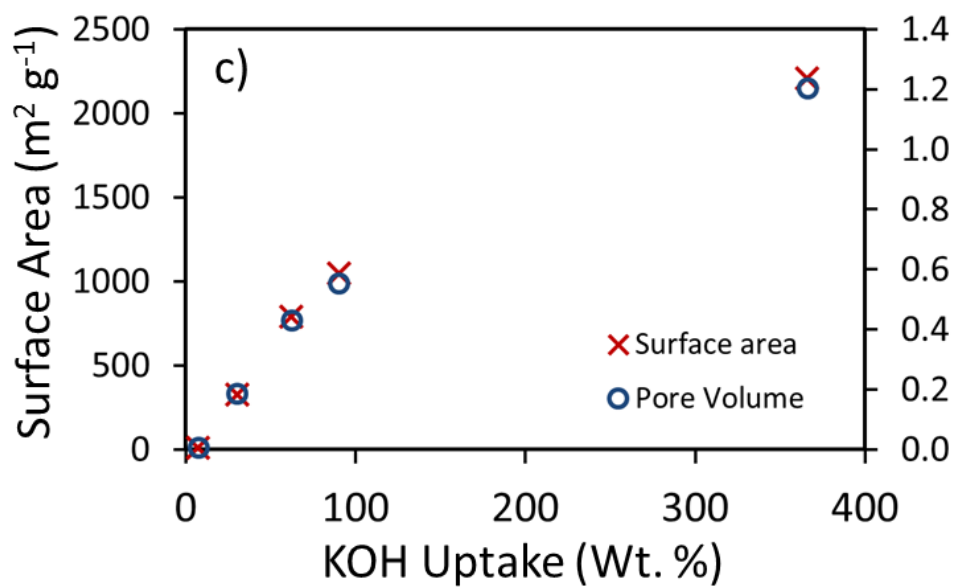

**Fig. S6.** The relationship of the BET surface areas for the porous activated carbon with the KOH uptake into the porous ice-templated PANs.

**Table S1** CO<sub>2</sub> adsorption capacities of various templated carbons published in the literature

| Template                                     | Precursor                              | Method                                                                                       | BET SSA<br>(m <sup>2</sup> g <sup>-1</sup> ) | N-content<br>(wt. %) | CO <sub>2</sub><br>Adsorption<br>(mmol g <sup>-1</sup> ) | Conditions      | Ref.      |
|----------------------------------------------|----------------------------------------|----------------------------------------------------------------------------------------------|----------------------------------------------|----------------------|----------------------------------------------------------|-----------------|-----------|
| Pluronic F127                                | Resorcinol & Formaldehyde (RF)         | RF polymerization with amine, carbonization                                                  | 670                                          | 0.28                 | 3.3                                                      | 298 K, ~1 Bar   | [1]       |
| Pluronic F127                                | Resorcinol & Formaldehyde (RF)         | RF polymerization with amine, carbonization and KOH activation                               | 1613                                         | 0.68                 | 3.1                                                      | 298 K, 0.95 Bar | [2]       |
| Pluronic F127                                | Dicyandiamide, Resol                   | Polymerization, carbonization                                                                | 1417                                         | 6.7                  | 3.2                                                      | 298 K, 1 Bar    | [3]       |
| Pluronic 123                                 | Polypyrrole                            | Polymerization of pyrrole, carbonization                                                     | 941                                          | 5.8                  | 4.5                                                      | 298 K, 1 Bar    | [4]       |
| Benzimidazole-Linked Polymers                | Benzimidazole-Linked Polymers          | Direct carbonization (polymer acts as precursor and template) & KOH activation               | 1630                                         | 7.9                  | 5.8                                                      | 298 K, 1 Bar    | [5]       |
| Hypercrosslinked porous polymer (COP)        | Hypercrosslinked porous polymer (COP)  | Direct carbonization & KOH activation                                                        | 1950                                         | Not given            | 7.6                                                      | 273 K, 1 Bar    | [6]       |
| Zeolite EMC-2                                | Acetonitrile                           | CVD                                                                                          | 2559                                         | 6 - 7                | 4.0                                                      | 298 K, ~1Bar    | [7]       |
| Zeolite EMC-2                                | Acetonitrile                           | CVD                                                                                          | 3360                                         | 4.7                  | 4.4                                                      | 298 K, 1 Bar    | [8]       |
| ZIF-69                                       | ZIF-69                                 | Direct carbonization (ZIF acts as template and precursor) & KOH activation                   | 2264                                         | 1.2                  | 4.8                                                      | 273 K, 1 Bar    | [9]       |
| MOF-5                                        | MOF-5                                  | Direct carbonization (MOF acts as template and precursor)                                    | 2734                                         | Not given            | 27.4                                                     | 300 K, 30 Bar   | [10]      |
| MOF-74                                       | MOF-74                                 | Direct carbonization (MOF acts as template and precursor)                                    | 2495                                         | Not given            | 3.4                                                      | 300 K, 1.5 Bar  | [10]      |
| Polymer microspheres (GDMA-co-MAA)           | Melamine (ML)                          | ML polymerization, carbonization & KOH activation                                            | 683                                          | 14.5                 | 2.7                                                      | 298 K, 1 Bar    | [11]      |
| Mesoporous Silica (IBN-9)                    | Furfuryl Alcohol & p-diaminobenzene    | Mixing precursors & templates, drying, carbonization & activation                            | 890                                          | 13                   | 10.5                                                     | 298 K, 8 Bar    | [12]      |
| Mesoporous silica (SBA-15) spheres           | Ethylenediamine & carbon tetrachloride | Mixing, polymerization & carbonization                                                       | 550                                          | 17.8                 | 2.9                                                      | 298 K, 1 ~Bar   | [13]      |
| Sol-gel method*                              | Polyaniline (PANi)                     | PANi polymerization (hydrogel) and freeze-drying (xerogel), carbonization and KOH activation | 4196                                         | 0.55                 | 28.3                                                     | 298 K, 30 Bar   | [14]      |
| Sol-gel method*                              | Resorcinol & Formaldehyde (RF)         | RF polymerization and air-drying (aerogel), carbonization                                    | 1521                                         | Not given            | 3.0                                                      | 298 K, 1 Bar    | [15]      |
| Temperature induced phase separation (TIPS)* | Polyacrylonitrile (PAN)                | Carbonization & CO <sub>2</sub> activation                                                   | 2501                                         | 1.8                  | 10.6                                                     | 298 K, 3 Bar    | [16]      |
| DMSO Ice-crystals                            | Polyacrylonitrile (PAN)                | This work (IT-AC50)                                                                          | 1049                                         | 14.9                 | 16.1                                                     | 298 K, 10 Bar   | This Work |
| DMSO Ice-crystals                            | Polyacrylonitrile (PAN)                | This work (IT-AC50)                                                                          | 1049                                         | 14.9                 | 3.2                                                      | 298 K ~1 Bar    | This Work |

\* Not a templating method but included for comparison



**Table S2** H<sub>2</sub> adsorption capacities of various templated carbons published in the literature

| Template                                 | Precursor                                | Method                                                                           | BET SSA<br>(m <sup>2</sup> g <sup>-1</sup> ) | H <sub>2</sub> Adsorption<br>(wt. %) | Conditions    | Ref.         |
|------------------------------------------|------------------------------------------|----------------------------------------------------------------------------------|----------------------------------------------|--------------------------------------|---------------|--------------|
| Zeolite Y                                | Acetonitrile                             | CVD, post-activation w. KOH                                                      | 3064                                         | 2.6                                  | 77 K, 1 Bar   | [17]         |
| Zeolite β                                | Acetonitrile                             | CVD                                                                              | 3150                                         | 2.6                                  | 77 K, 1 Bar   | [18]         |
| Zeolite 13X                              | Acetonitrile                             | CVD                                                                              | 1589                                         | 1.6                                  | 77 K, 1 Bar   | [19]         |
| Zeolite Y                                | Acetonitrile                             | CVD                                                                              | 1825                                         | 2.0                                  | 77K, 1 Bar    | [19]         |
| Zeolite Y                                | Propylene                                | CVD                                                                              | 2117                                         | 2.0                                  | 77K, 1 Bar    | [20]         |
| Mesoporous Silica<br>(MCM-48)            | Sucrose                                  | Aqueous impregnation &<br>carbonization                                          | 2390                                         | 3.5                                  | 77K, 1 Bar    | [21]         |
| Mesoporous Silica<br>(MCM-48)            | Sucrose                                  | Aqueous impregnation &<br>carbonization                                          | 1646                                         | 2.7                                  | 77K, 60 Bar   | [22]         |
| Mesoporous Silica<br>(KIT-6)             | Polycarbosilane                          | Organic impregnation &<br>carbonization                                          | 2914                                         | 3.0                                  | 77 K, 135 Bar | [23]         |
| Mesoporous Silica (SBA-15)               | Sucrose                                  | Aqueous impregnation,<br>carbonization & CO <sub>2</sub> activation              | 2749                                         | 2.3                                  | 77 K, 1 Bar   | [24]         |
| Colloidal Silica                         | Sucrose                                  | Aerosol drying & carbonization                                                   | 1995                                         | 2.0                                  | 77 K, 1.1 Bar | [25]         |
| MOF (IRMOF-1)                            | MOF (IRMOF-1)                            | Direct carbonization (MOF acts as<br>template and precursor)                     | 3447                                         | 3.3                                  | 77 K, 1 Bar   | [26]         |
| ZIF-8                                    | ZIF-8                                    | Direct carbonization (ZIF acts as<br>template and precursor) & KOH<br>activation | 2437                                         | 2.6                                  | 77 K, ~1 Bar  | [9]          |
| Hypercrosslinked porous<br>polymer (COP) | Hypercrosslinked<br>porous polymer (COP) | Direct carbonization & KOH<br>activation                                         | 2189                                         | 2.6                                  | 77 K, 1 Bar   | [6]          |
| Sol-gel method*                          | Resorcinol &<br>Formaldehyde (RF)        | RF polymerization and air-drying<br>(aerogel), carbonization                     | 1980                                         | 4.3                                  | 77 K, 20 Bar  | [15]         |
| DMSO Ice-crystals                        | Polyacrylonitrile (PAN)                  | This Work (IT-ACMAX)                                                             | 2206                                         | 2.7                                  | 77 K, 1.2 Bar | This<br>work |

\* Not a templating method but included for comparison

## References for Table S1 and Table S2

- [1] G.-P. Hao, W.-C. Li, D. Qian, G.-H. Wang, W.-P. Zhang, T. Zhang, A.-Q. Wang, F. Schüth, H.-J. Bongard, and A.-H. Lu, Structurally Designed Synthesis of Mechanically Stable Poly(benzoxazine-co-resol)-Based Porous Carbon Monoliths and Their Application as High-Performance CO<sub>2</sub> Capture Sorbents, *J. Am. Chem. Soc.*, 2011, **133**, 11378–11388.
- [2] J. Yu, M. Guo, F. Muhammad, A. Wang, F. Zhang, Q. Li, and G. Zhu, One-pot synthesis of highly ordered nitrogen-containing mesoporous carbon with resorcinol–urea–formaldehyde resin for CO<sub>2</sub> capture, *Carbon*, 2014, **69**, 502–514.
- [3] J. Wei, D. Zhou, Z. Sun, Y. Deng, Y. Xia, and D. Zhao, A Controllable Synthesis of Rich Nitrogen-Doped Ordered Mesoporous Carbon for CO<sub>2</sub> Capture and Supercapacitors, *Adv. Funct. Mater.*, 2013, **23**, 2322–2328.
- [4] J. W. F. To, J. He, J. Mei, R. Haghpanah, Z. Chen, T. Kurosawa, S. Chen, W.-G. Bae, L. Pan, J. B.-H. Tok, J. Wilcox, and Z. Bao, Hierarchical N-Doped Carbon as CO<sub>2</sub> Adsorbent with High CO<sub>2</sub> Selectivity from Rationally Designed Polypyrrole Precursor, *J. Am. Chem. Soc.*, 2016, **138**, 1001–1009.
- [5] B. Ashourirad, A. K. Sekizkardes, S. Altarawneh, and H. M. El-Kaderi, Exceptional Gas Adsorption Properties by Nitrogen-Doped Porous Carbons Derived from Benzimidazole-Linked Polymers, *Chem. Mater.*, 2015, **27**, 1349–1358.
- [6] A. Modak and A. Bhaumik, Porous carbon derived via KOH activation of a hypercrosslinked porous organic polymer for efficient CO<sub>2</sub>, CH<sub>4</sub>, H<sub>2</sub> adsorptions and high CO<sub>2</sub>/N<sub>2</sub> selectivity, *J. Solid State Chem.*, 2015, **232**, 157–162.
- [7] L. Wang and R. T. Yang, Significantly Increased CO<sub>2</sub> Adsorption Performance of Nanostructured Templated Carbon by Tuning Surface Area and Nitrogen Doping, *J. Phys. Chem. C*, 2012, **116**, 1099–1106.
- [8] Y. Xia, R. Mokaya, G. S. Walker, and Y. Zhu, Superior CO<sub>2</sub> Adsorption Capacity on N-doped, High-Surface-Area, Microporous Carbons Templated from Zeolite, *Adv. Energy Mater.*, 2011, **1**, 678–683.
- [9] Q. Wang, W. Xia, W. Guo, L. An, D. Xia, and R. Zou, Functional Zeolitic-Imidazolate-Framework-Templated Porous Carbon Materials for CO<sub>2</sub> Capture and Enhanced Capacitors, *Chem. - An Asian J.*, 2013, **8**, 1879–1885.
- [10] G. Srinivas, V. Krungleviciute, Z.-X. Guo, and T. Yildirim, Exceptional CO<sub>2</sub> capture in a hierarchically porous carbon with simultaneous high surface area and pore volume, *Energy Environ. Sci.*, 2014, **7**, 335–342.
- [11] D. Li, Y. Chen, M. Zheng, H. Zhao, Y. Zhao, and Z. Sun, Hierarchically Structured Porous Nitrogen-Doped Carbon for Highly Selective CO<sub>2</sub> Capture, *ACS Sustain. Chem. Eng.*, 2016, **4**, 298–304.
- [12] Y. Zhao, L. Zhao, K. X. Yao, Y. Yang, Q. Zhang, and Y. Han, Novel porous carbon materials with ultrahigh nitrogen contents for selective CO<sub>2</sub> capture, *J. Mater. Chem.*, 2012, **22**, 19726.
- [13] Q. Li, J. Yang, D. Feng, Z. Wu, Q. Wu, S. S. Park, C.-S. Ha, and D. Zhao, Facile synthesis of porous carbon nitride spheres with hierarchical three-dimensional mesostructures for CO<sub>2</sub> capture, *Nano Res.*, 2010, **3**, 632–642.

- [14] J. He, J. W. F. To, P. C. Psarras, H. Yan, T. Atkinson, R. T. Holmes, D. Nordlund, Z. Bao, and J. Wilcox, Tunable Polyaniline-Based Porous Carbon with Ultrahigh Surface Area for CO<sub>2</sub> Capture at Elevated Pressure, *Adv. Energy Mater.*, 2016, **6**, 1502491.
- [15] C. Robertson and R. Mokaya, Microporous activated carbon aerogels via a simple subcritical drying route for CO<sub>2</sub> capture and hydrogen storage, *Micropor. Mesopor. Mater.*, 2013, **179**, 151–156.
- [16] M. Nandi, K. Okada, A. Dutta, A. Bhaumik, J. Maruyama, D. Derks, and H. Uyama, Unprecedented CO<sub>2</sub> uptake over highly porous N-doped activated carbon monoliths prepared by physical activation, *Chem. Commun.*, 2012, **48**, 10283–10285.
- [17] M. Sevilla, N. Alam, and R. Mokaya, Enhancement of Hydrogen Storage Capacity of Zeolite-Templated Carbons by Chemical Activation, *J. Phys. Chem. C*, 2010, **114**, 11314–11319.
- [18] Z. Yang, Y. Xia, and R. Mokaya, Enhanced Hydrogen Storage Capacity of High Surface Area Zeolite-like Carbon Materials, *J. Am. Chem. Soc.*, 2007, **129**, 1673–1679.
- [19] Z. Yang, Y. Xia, X. Sun, and R. Mokaya, Preparation and hydrogen storage properties of zeolite-templated carbon materials nanocast via chemical vapor deposition: effect of the zeolite template and nitrogen doping., *J. Phys. Chem. B*, 2006, **110**, 18424–31.
- [20] L. Chen, R. K. Singh, and P. Webley, Synthesis, characterization and hydrogen storage properties of microporous carbons templated by cation exchanged forms of zeolite Y with propylene and butylene as carbon precursors, *Micropor. Mesopor. Mater.*, 2007, **102**, 159–170.
- [21] R. Gadiou, S.-E. Saadallah, T. Piquero, P. David, J. Parmentier, and C. Vix-Guterl, The influence of textural properties on the adsorption of hydrogen on ordered nanostructured carbons, *Microporous Mesoporous Mater.*, 2005, **79**, 121–128.
- [22] E. Terrés, B. Panella, T. Hayashi, Y. A. Kim, M. Endo, J. M. Dominguez, M. Hirscher, H. Terrones, and M. Terrones, Hydrogen storage in spherical nanoporous carbons, *Chem. Phys. Lett.*, 2005, **403**, 363–366.
- [23] M. Oschatz, E. Kockrick, M. Rose, L. Borchardt, N. Klein, I. Senkovska, T. Freudenberg, Y. Korenblit, G. Yushin, and S. Kaskel, A cubic ordered, mesoporous carbide-derived carbon for gas and energy storage applications, *Carbon*, 2010, **48**, 3987–3992.
- [24] K. Xia, Q. Gao, C. Wu, S. Song, and M. Ruan, Activation, characterization and hydrogen storage properties of the mesoporous carbon CMK-3, *Carbon*, 2007, **45**, 1989–1996.
- [25] Q. Hu, Y. Lu, and G. P. Meisner, Preparation of Nanoporous Carbon Particles and Their Cryogenic Hydrogen Storage Capacities, *J. Phys. Chem. C*, 2008, **112**, 1516–1523.
- [26] S. J. Yang, T. Kim, J. H. Im, Y. S. Kim, K. Lee, H. Jung, and C. R. Park, MOF-Derived Hierarchically Porous Carbon with Exceptional Porosity and Hydrogen Storage Capacity, *Chem. Mater.*, 2012, **24**, 464–470.
